# Supplementary material for: An easy and eco-friendly method to prepare reduced graphene oxide with Fe(OH)2 for use as a conductive additive for LiFePO4 cathode materials
Source: Royal Society of Chemistry journal article supplement (doi:10.1039/c3ra22744h), 2013-01-01
Supplement: c3ra22744h.pdf [file c3ra22744h.pdf]

## Electronic Supplementary Information (ESI)

### An easy and eco-friendly method to prepare reduced graphene oxide with Fe(OH)<sub>2</sub> for use as a conductive additive for LiFePO<sub>4</sub> cathode materials

Zhesheng Feng\*, Chuan Zhang, Jinju Chen, Yan Wang, Xiong Jin, Rui Zhang,  
Jing Hu

State Key Laboratory of Electronic Thin Films and Integrated Devices, University of Electronic Science  
and Technology of China, Chengdu 610054, PR China

\*Corresponding author. Tel.: +86 28 83207590. Fax: +86 28 83202569. E-mail address:  
[fzs@uestc.edu.cn](mailto:fzs@uestc.edu.cn) (ZS Feng).

TableS1. Results for atomic % in both RGO and GO paper samples by elemental analysis.

| Sample | C    | H    | O    | C/O atomic ratio |
|--------|------|------|------|------------------|
| GO     | 53.6 | 2.5  | 43.4 | 1.24             |
| RGO    | 89.3 | 1.28 | 8.5  | 10.5             |
